# Supplementary material for: Constructing a superhydrophobic free-standing cathode for highly efficient H2O2production over a wide pH range
Source: Royal Society of Chemistry journal article supplement (doi:10.1039/d2ta07598a), 2022-01-01
Supplement: d2ta07598a1.pdf [file d2ta07598a1.pdf]

Supporting Information for

**Constructing a superhydrophobic free-standing cathode for high-efficient H<sub>2</sub>O<sub>2</sub> production over a wide pH range**

Xiao Huang, Zhizhan Li, Wei Liu, Min Song, Chang Zhang, Jingwen Li, Deli Wang\*

*Key Laboratory of Material Chemistry for Energy Conversion and Storage, Ministry of Education, Hubei Key Laboratory of Material Chemistry and Service Failure, School of Chemistry and Chemical Engineering, Huazhong University of Science and Technology, Wuhan, 430074, PR China*

Corresponding author:

E-mail: wangdl81125@hust.edu.cn

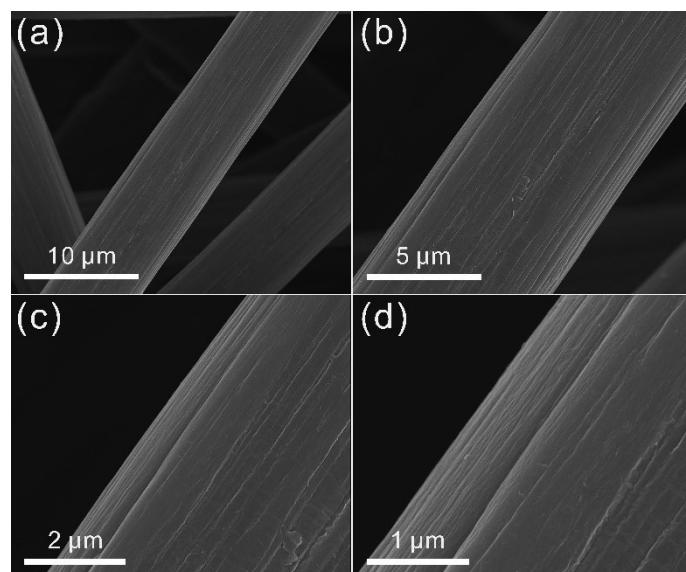

**Fig. S1** (a–d) SEM images of CFP.

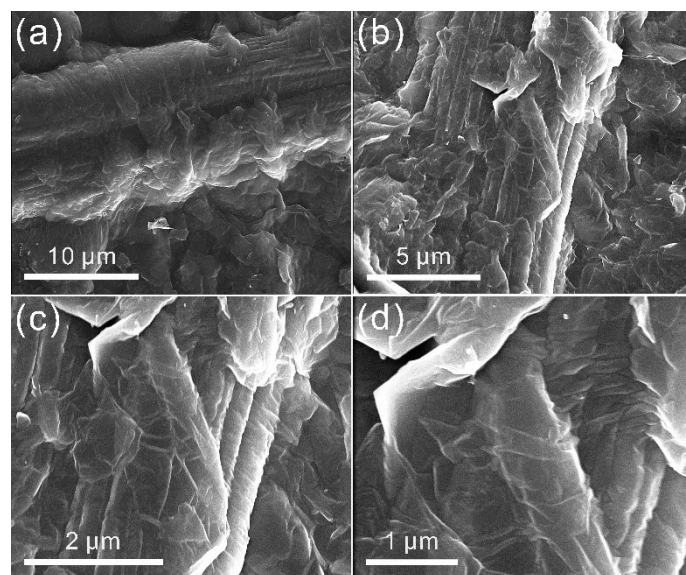

**Fig. S2** (a–d) SEM images of Co-NC/CFP.

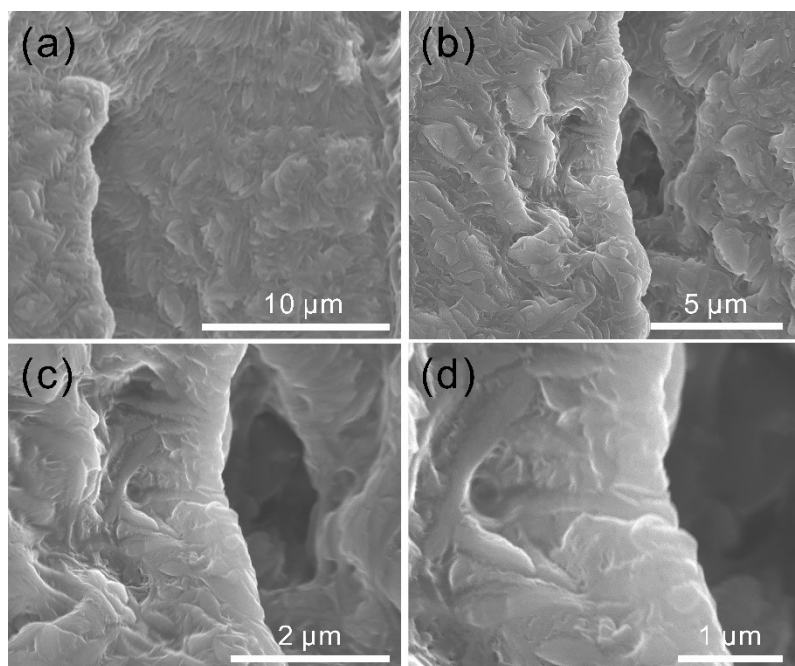

**Fig. S3** (a–d) SEM images of Co-NC/CFP-PTFE.

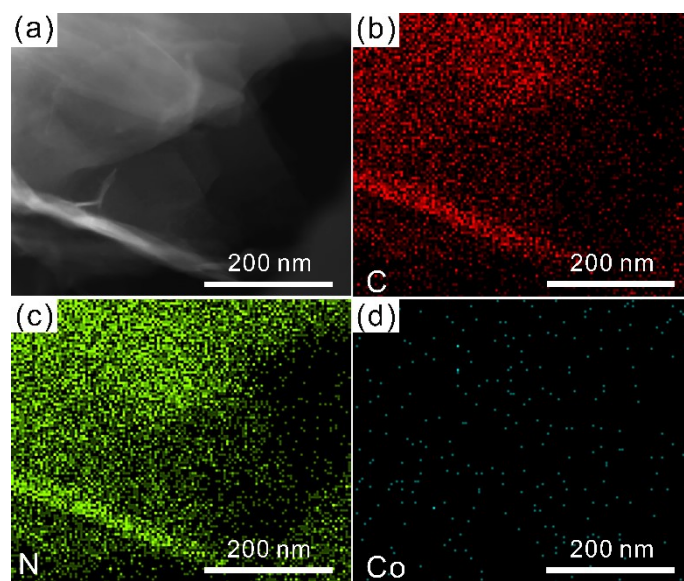

**Fig. S4** (a) TEM images and (b–d) mapping images of Co-NC/CFP.

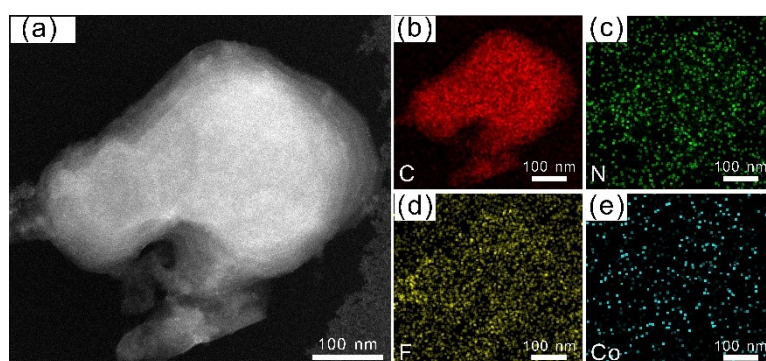

**Fig. S5** (a) TEM images and (b–e) mapping images of Co-NC/CFP-PTFE.

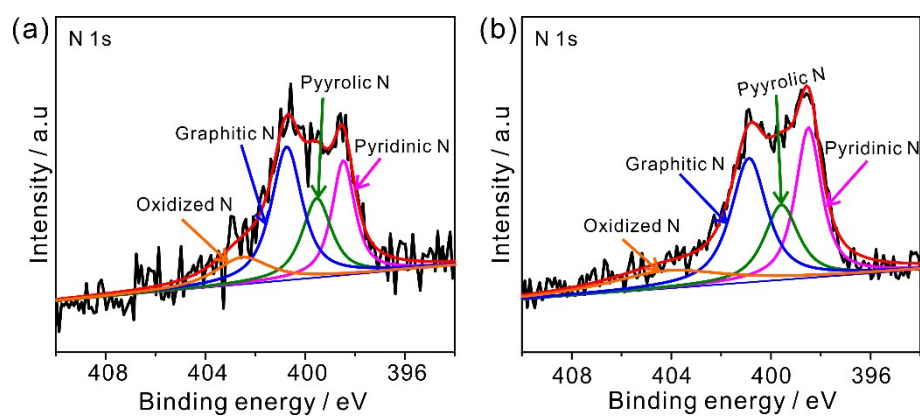

**Fig. S6** N 1s spectra of (a) Co-NC/CFP and (b) Co-NC/CFP-PTFE.

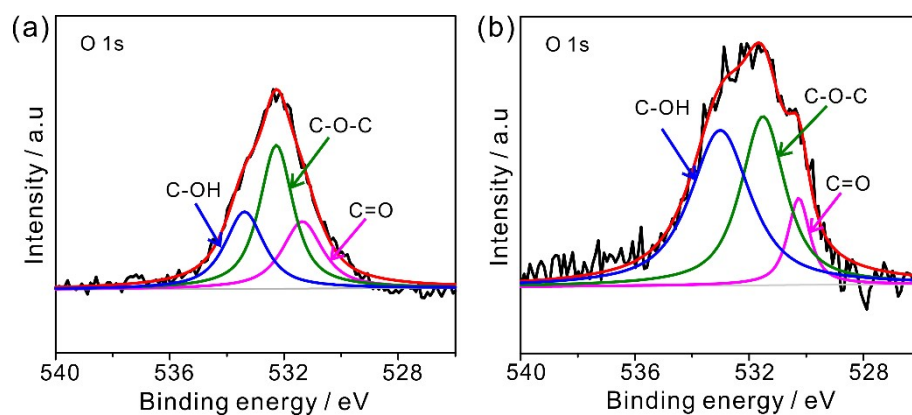

**Fig. S7** O 1s spectra of (a) Co-NC/CFP and (b) Co-NC/CFP-PTFE.

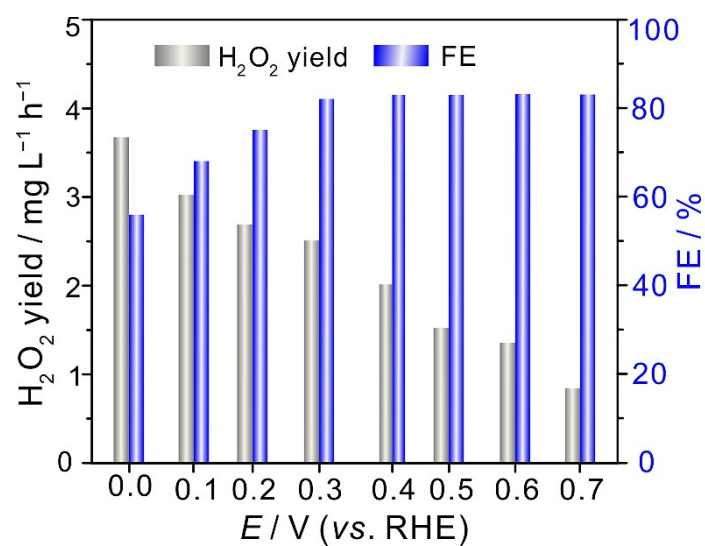

**Fig. S8**  $\text{H}_2\text{O}_2$  production rate of CFP in 0.05 M  $\text{H}_2\text{SO}_4$ .

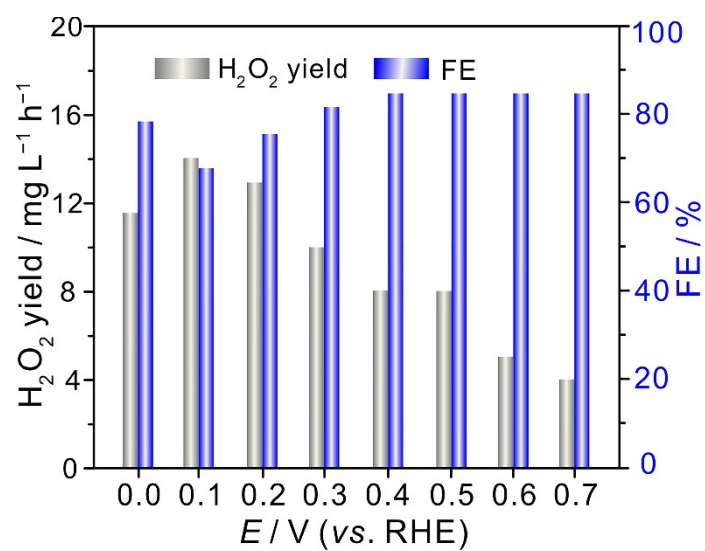

**Fig. S9**  $\text{H}_2\text{O}_2$  production rate of CFP in 0.1 M PBS.

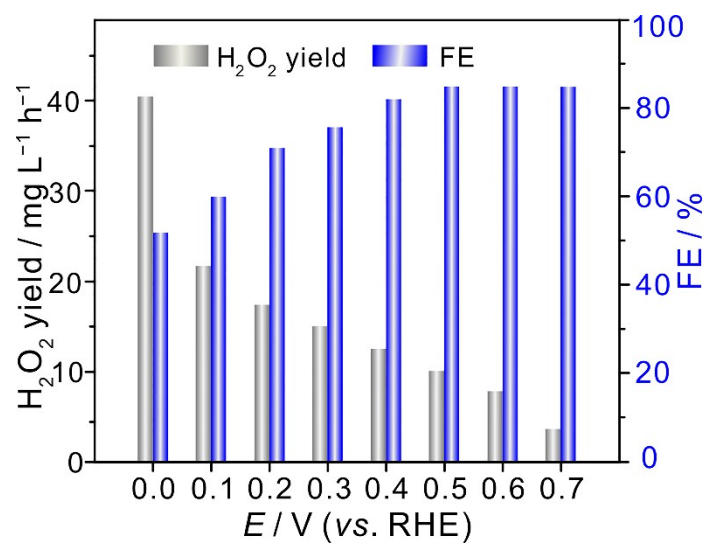

**Fig. S10**  $\text{H}_2\text{O}_2$  production rate of CFP in 0.1 M KOH.

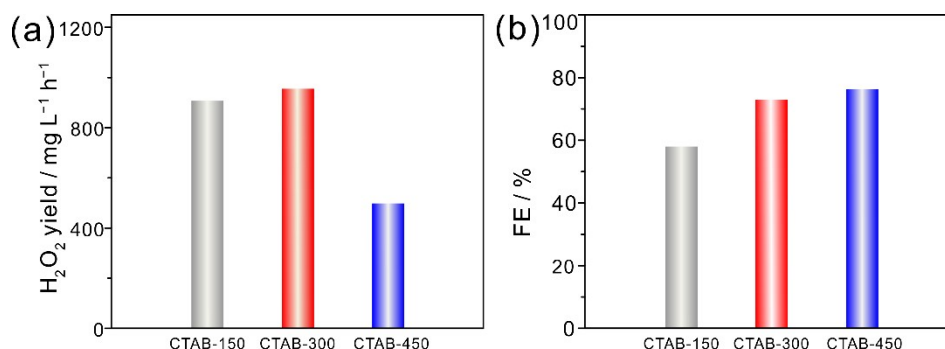

**Fig. S11**  $\text{H}_2\text{O}_2$  production rate and the corresponding FE of various CTAB-assisted Co-NC/CFP cathodes in 0.1 M PBS.

**Table S1**  $\text{H}_2\text{O}_2$  production rate comparison of Co-NC/CFP-PTFE with state of art catalysts from previous literature.

| Catalyst                        | Electrolyte                    | $E$ (vs. RHE) | $\text{H}_2\text{O}_2$ production rate | Ref.                                                       |
|---------------------------------|--------------------------------|---------------|----------------------------------------|------------------------------------------------------------|
| <b>Co-NC/CFP-PTFE</b>           | 0.1 M PBS                      | 0.1 V         | 1105                                   | <b>This work</b>                                           |
| $\text{Co}_1\text{-NG(O)}$      | 0.1 M KOH                      | 0.65 V        | 242                                    | <i>Nat. Mater.</i> , 2020, <b>19</b> , 436–442.            |
| Co-POC-O                        | 0.1 M KOH                      | 0.4 V         | 813                                    | <i>Adv. Mater.</i> , 2019, <b>31</b> , 1808173–1808180.    |
| Fe-C-O                          | 0.1 M PBS                      | 0.35 V        | 460                                    | <i>Nat. Commun.</i> , 2019, <b>10</b> , 3997–4007.         |
| CoNOC                           | 0.1 M $\text{HClO}_4$          | 0.1 V         | 345                                    | <i>J. Am. Chem. Soc.</i> , 2021, <b>143</b> , 7819–7827.   |
| CoSA/CC                         | 0.5 M $\text{H}_2\text{SO}_4$  | 0.1 V         | 460                                    | <i>Carbon Energy</i> , 2020, <b>2</b> , 276–282.           |
| $\text{CoSe}_2\text{@NCNTs/CP}$ | 0.1 M $\text{HClO}_4$          | 0.1 V         | 172                                    | <i>Nano Res.</i> , 2022, <b>15</b> , 304–309.              |
| o- $\text{CoSe}_2\text{/CFP}$   | 0.05 M $\text{H}_2\text{SO}_4$ | 0.5 V         | 92                                     | <i>Energy Environ. Sci.</i> , 2020, <b>13</b> , 4189–4203. |
| CCNS                            | 0.05 M $\text{H}_2\text{SO}_4$ | 0.25 V        | 84                                     | <i>ACS Catal.</i> , 2021, <b>11</b> , 12643–12650.         |

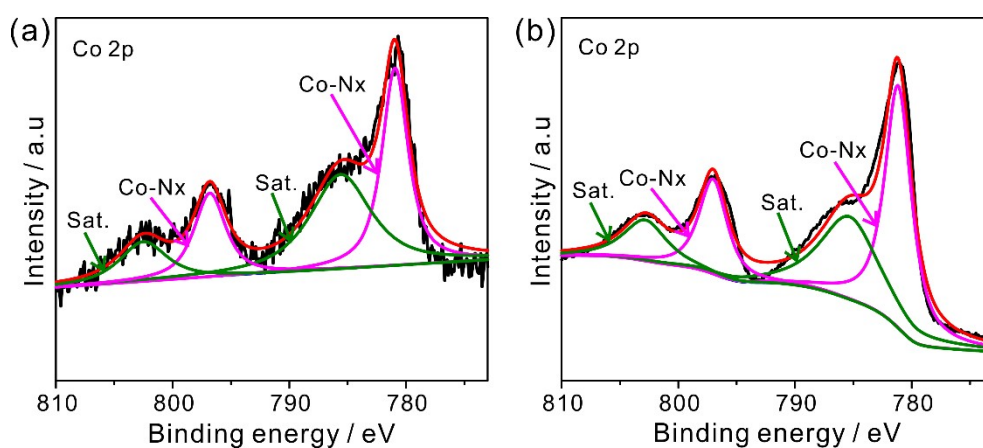

**Fig. S12** Co 2p spectra of (a) Co-NC/CFP and (b) Co-NC/CFP-PTFE after long cycle stability.

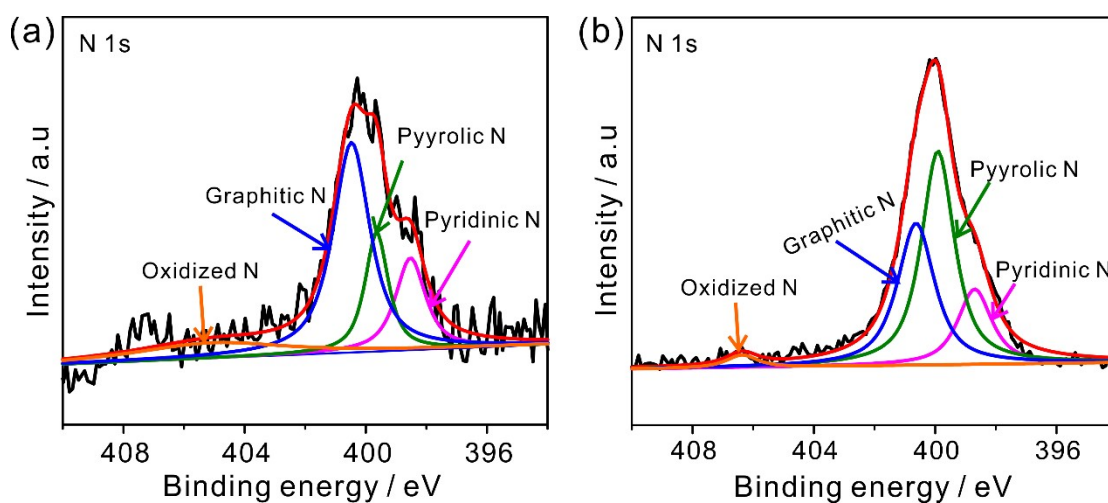

**Fig. S13** N 1s spectra of (a) Co-NC/CFP and (b) Co-NC/CFP-PTFE after long cycle stability.



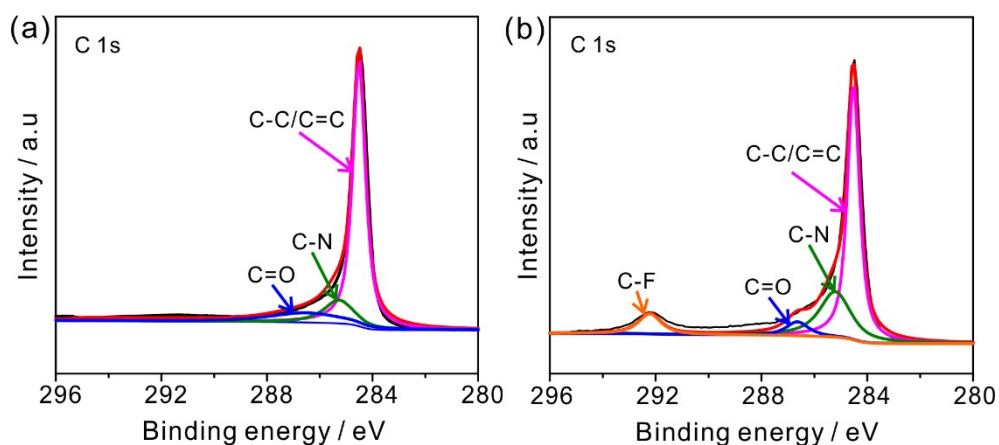

**Fig. S14** C 1s spectra of (a) Co-NC/CFP and (b) Co-NC/CFP-PTFE after long cycle stability.

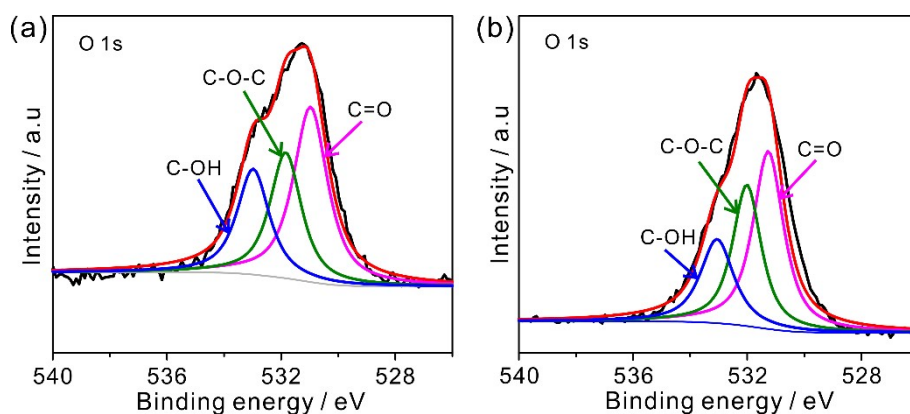

**Fig. S15** O 1s spectra of (a) Co-NC/CFP and (b) Co-NC/CFP-PTFE after long cycle stability.

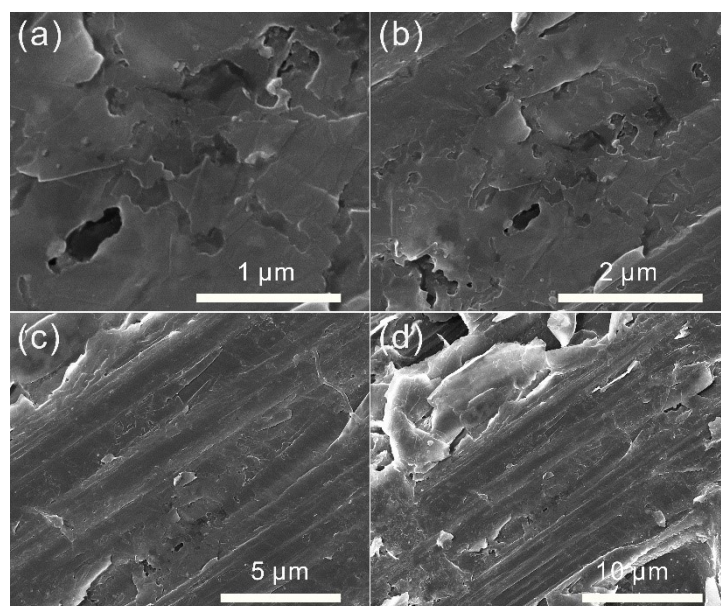

**Fig. S16** (a–d) SEM images of Co-NC/CFP after long cycle stability.

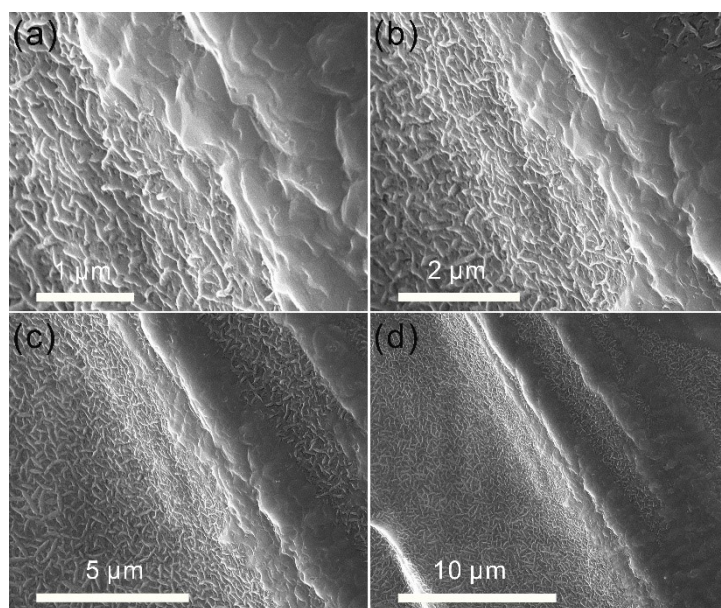

**Fig. S17** (a–d) SEM images of Co-NC/CFP-PTFE after long cycle stability.

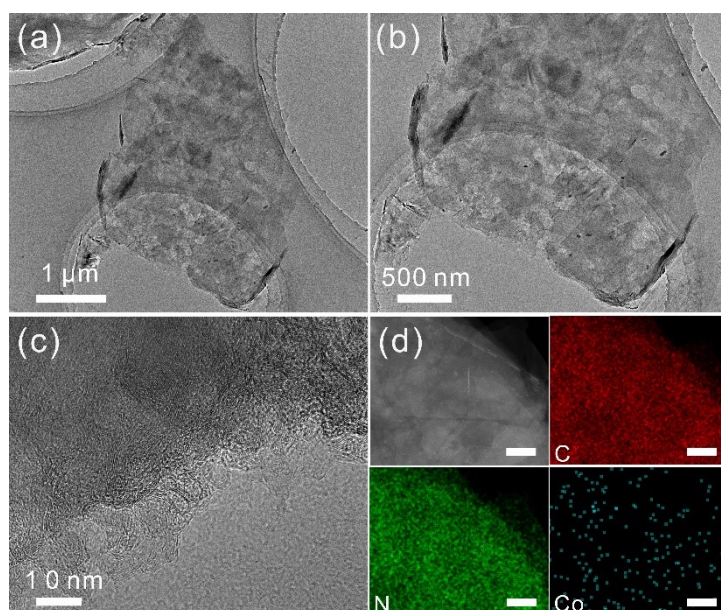

**Fig. S18** (a–c) TEM images and (d) mapping images of Co-NC/CFP.

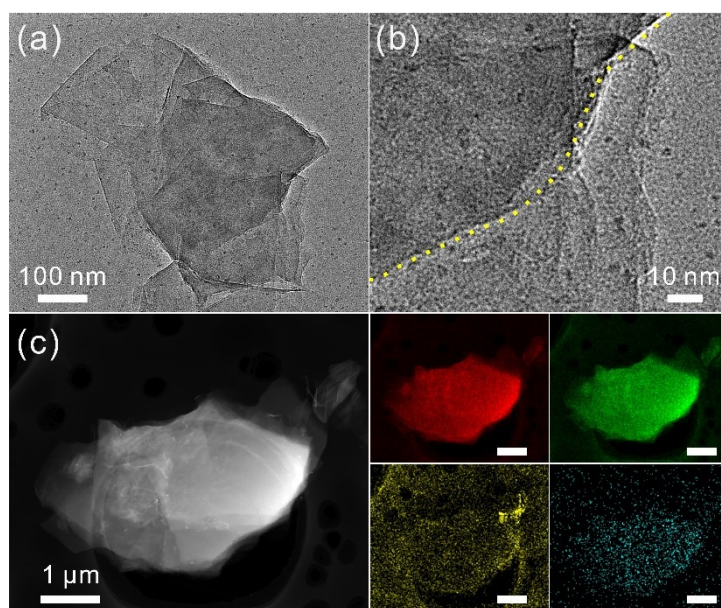

**Fig. S19** (a, b) TEM images and (c) mapping images of Co-NC/CFP-PTFE.

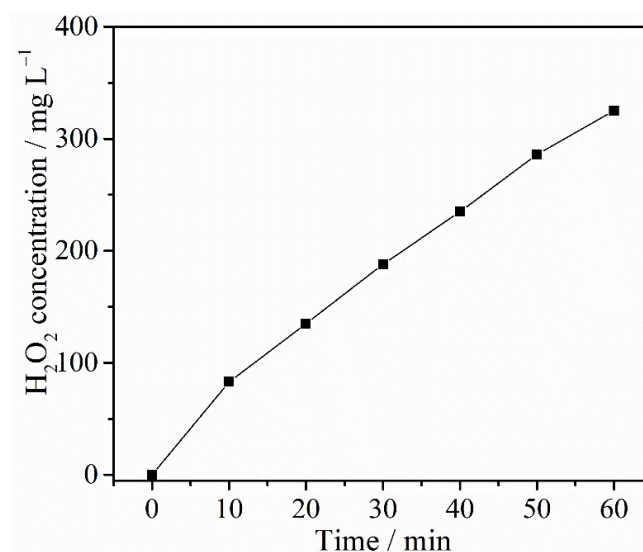

**Fig. S20**  $\text{H}_2\text{O}_2$  concentration versus time in a dual-cathode process.

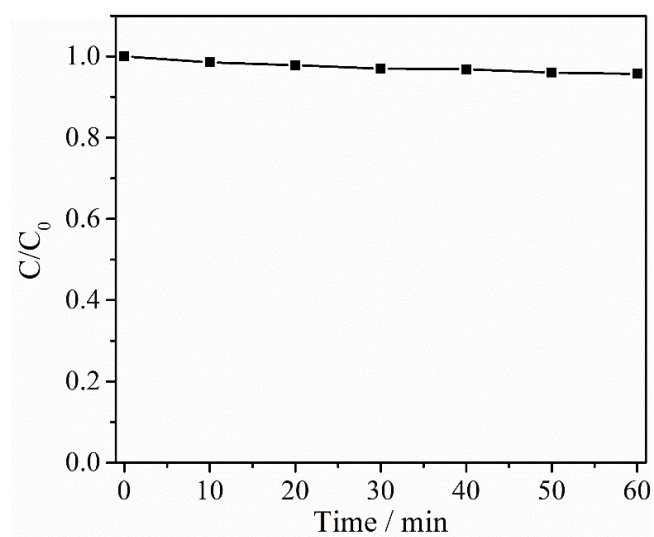

**Fig. S21** RhB degradation of CFP with a dual-cathode process.



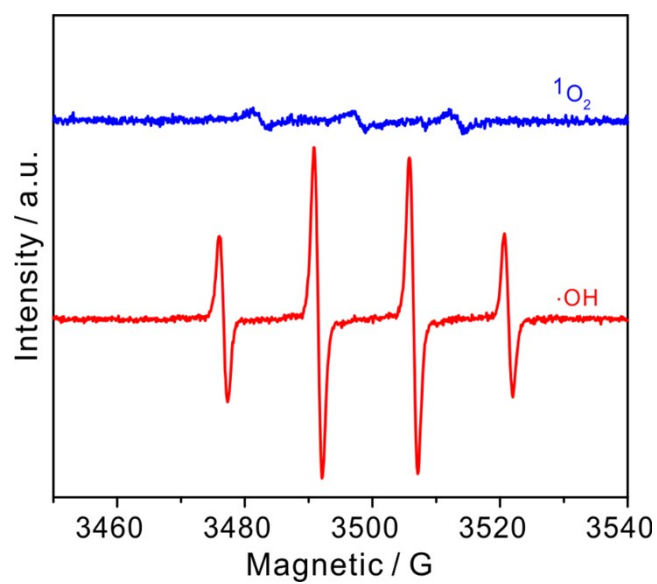

**Fig. S22** Detection of common ROSs in the dual-cathode system.

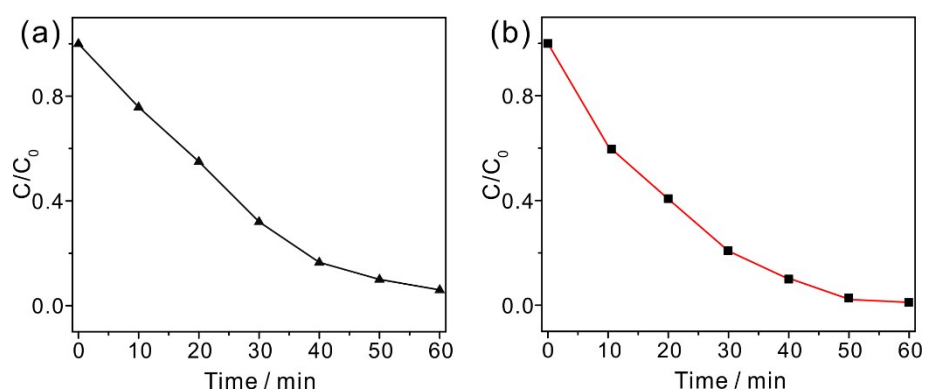

**Fig. S23** RhB degradation of Co-NC/CFP-PTFE based dual-cathode system in 0.05 M H<sub>2</sub>SO<sub>4</sub> and 0.1 M KOH.

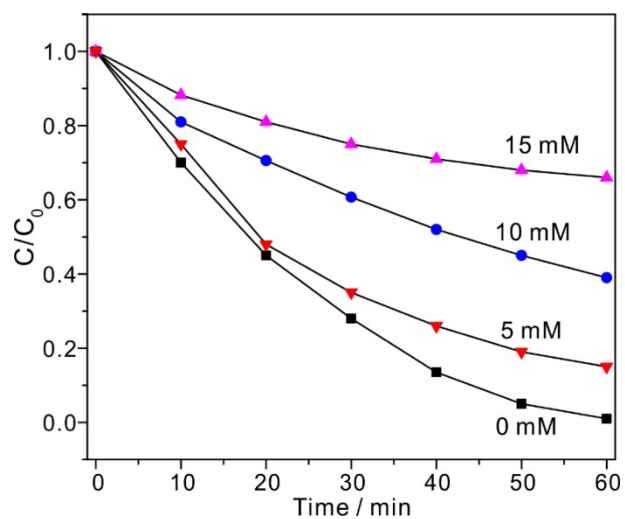

**Fig. S24** Effects of quenching agent TBA on the removal efficiency of RhB.

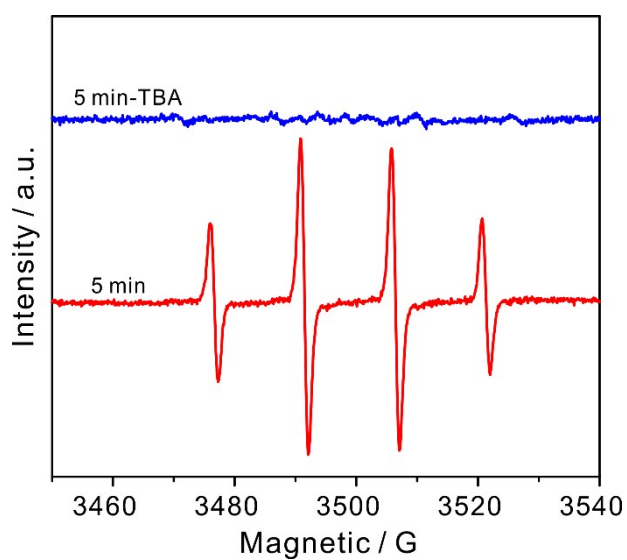

**Fig. S25** EPR spin trapping with DMPO at 5-min operation with/without TBA addition.
